# Supplementary material for: A microsatellite-based linkage map of salt tolerant tilapia (Oreochromis mossambicus x Oreochromis spp.) and mapping of sex-determining loci
Source: PubMed Central journal article supplement (PMC3565888; doi:10.1186/1471-2164-14-58), 2013-01-28
Supplement: 1471-2164-14-58-S2.pdf [file 1471-2164-14-58-S2.pdf]

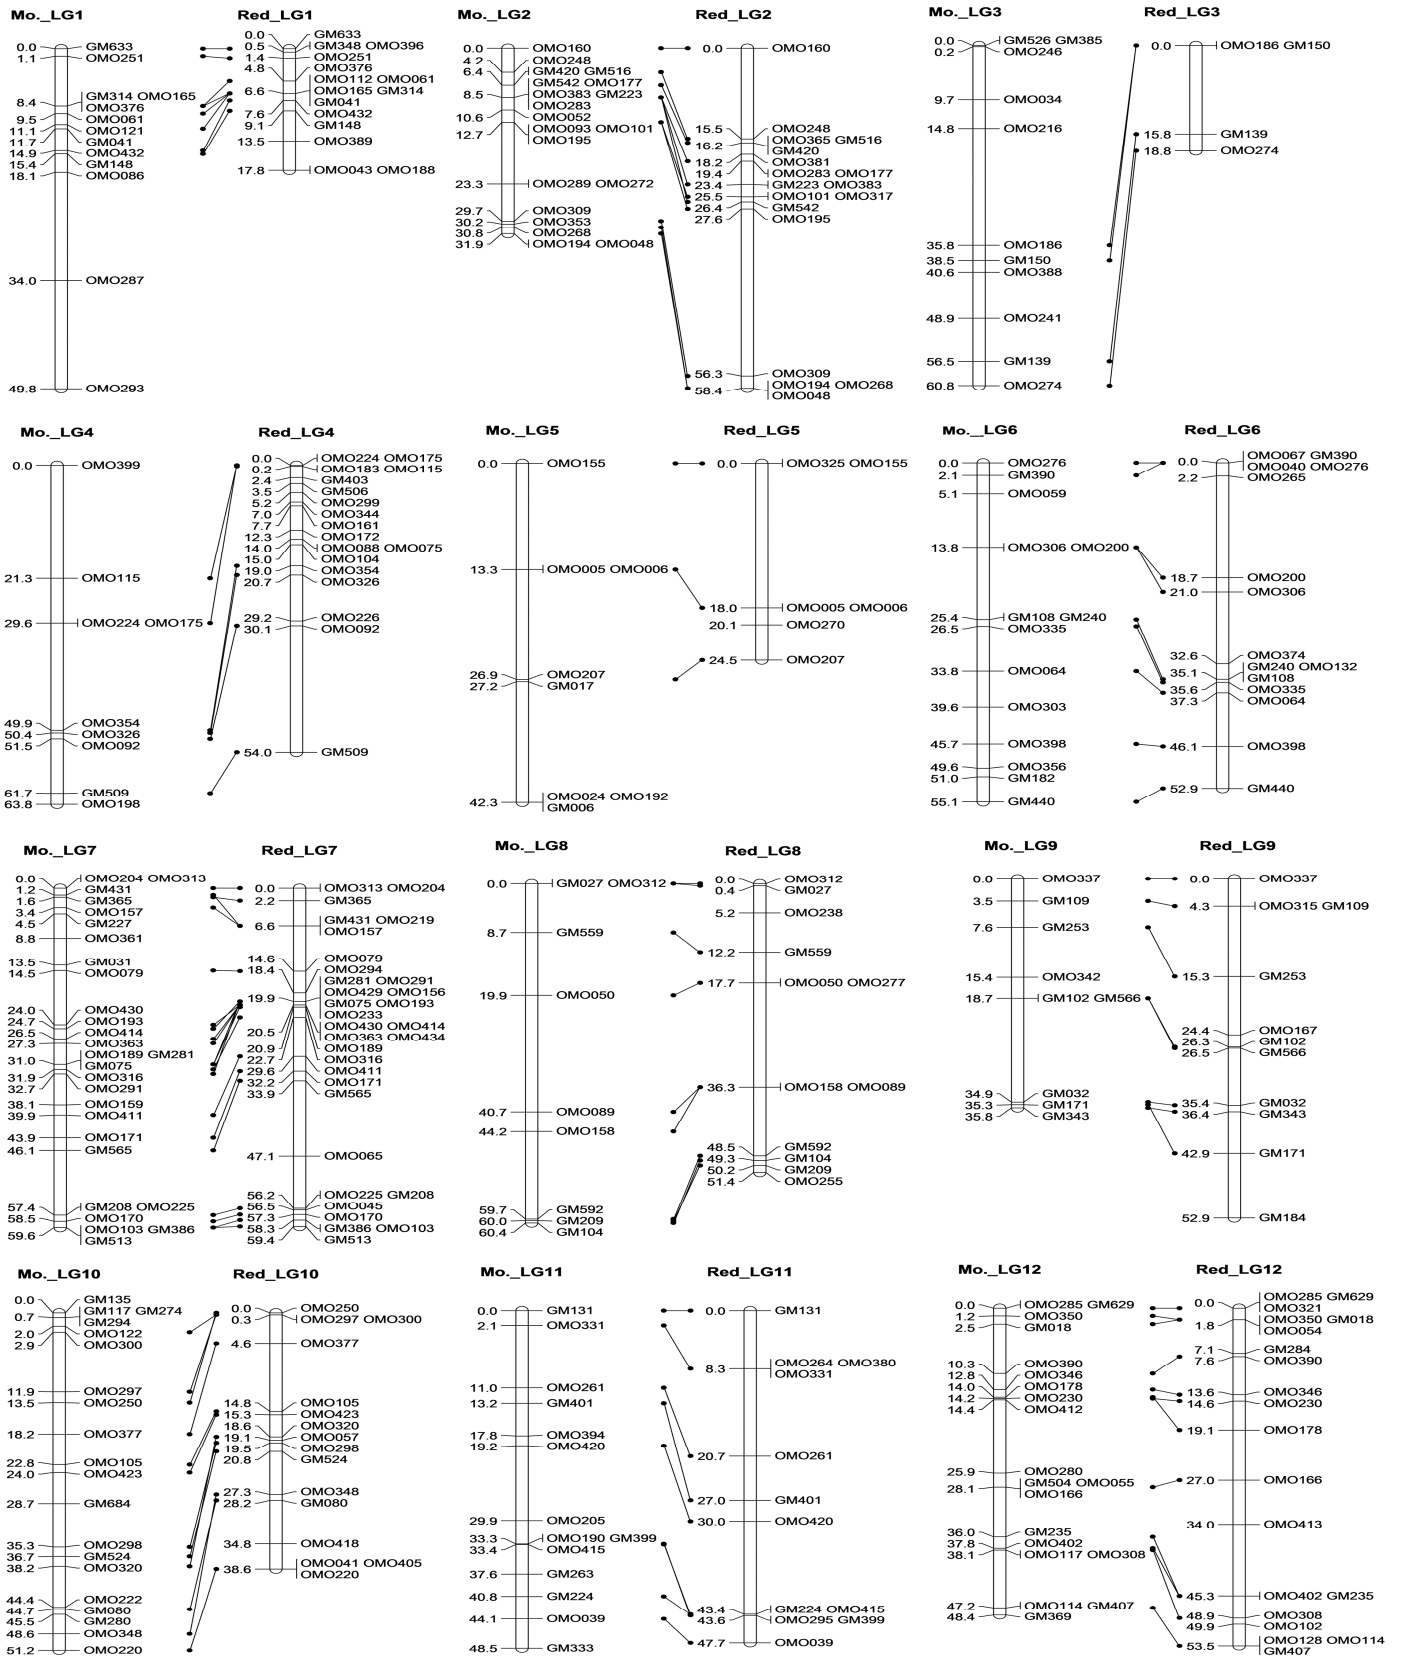

**Figure S1. Comparative map between Mozambique tilapia and red tilapia (LG1-12)**

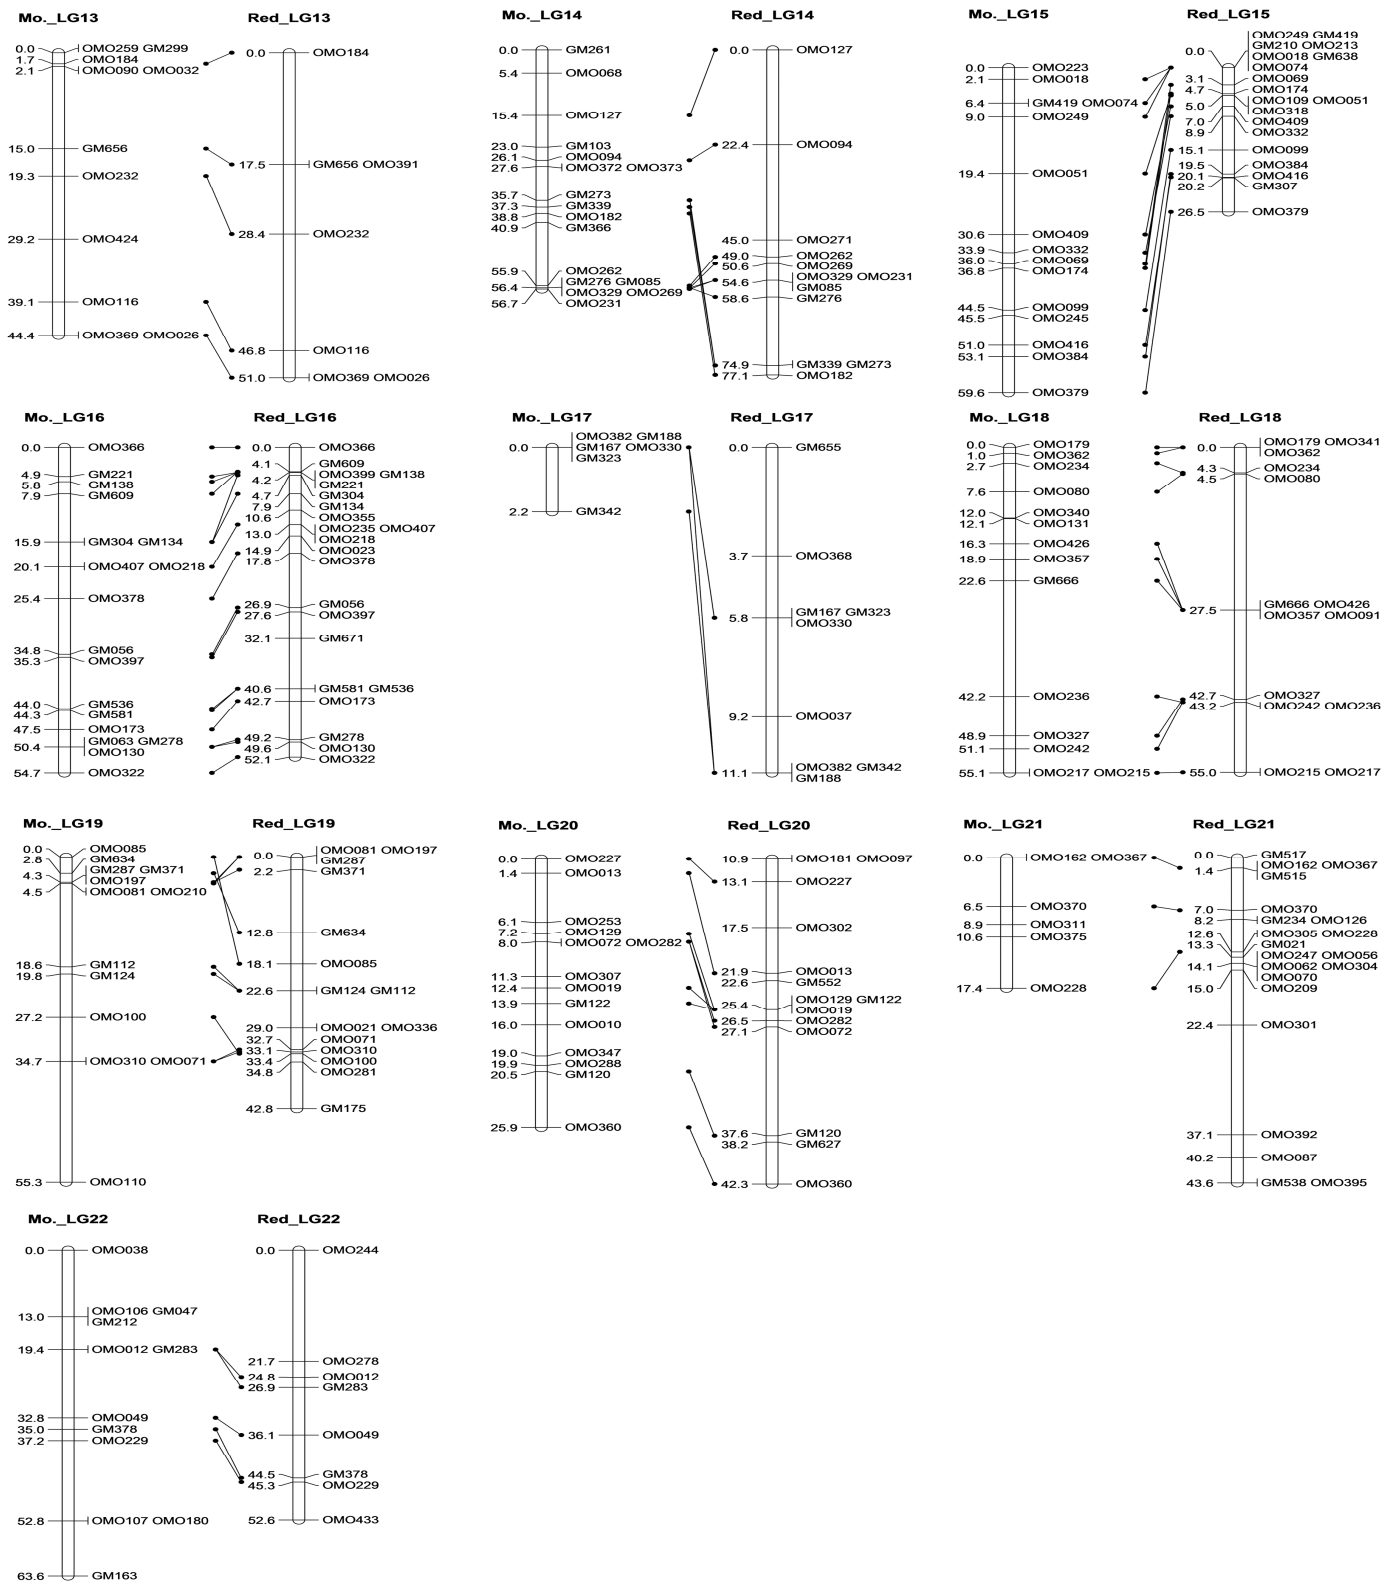

**Figure S1. Comparative map between Mozambique tilapia and red tilapia (LG13-22)**
