# Supplementary material for: A microsatellite-based linkage map of salt tolerant tilapia (Oreochromis mossambicus x Oreochromis spp.) and mapping of sex-determining loci
Source: PubMed Central journal article supplement (PMC3565888; doi:10.1186/1471-2164-14-58), 2013-01-28
Supplement: 1471-2164-14-58-S4.pdf [file 1471-2164-14-58-S4.pdf]

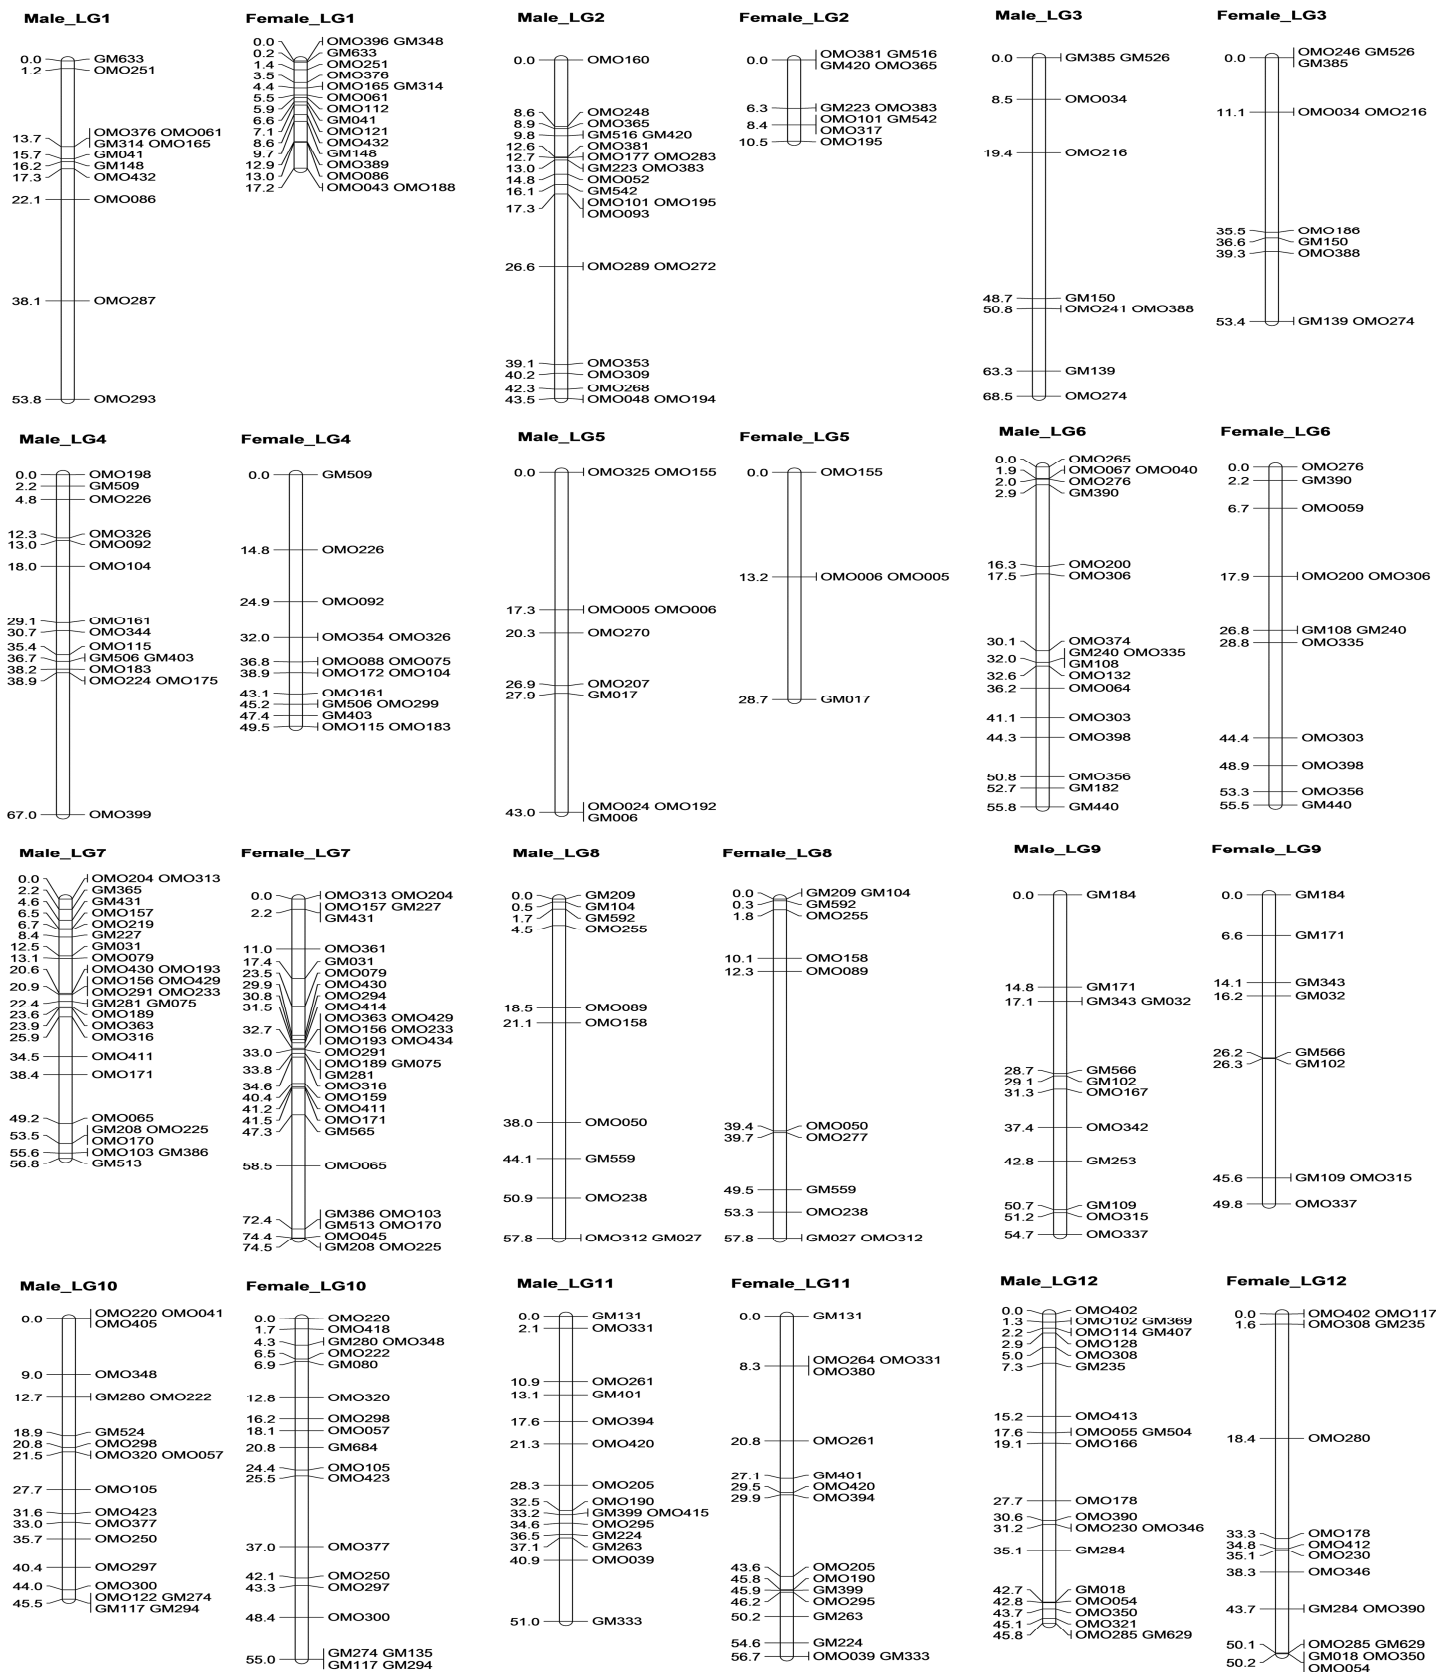

Figure S2. Linkage maps of male and female (1)

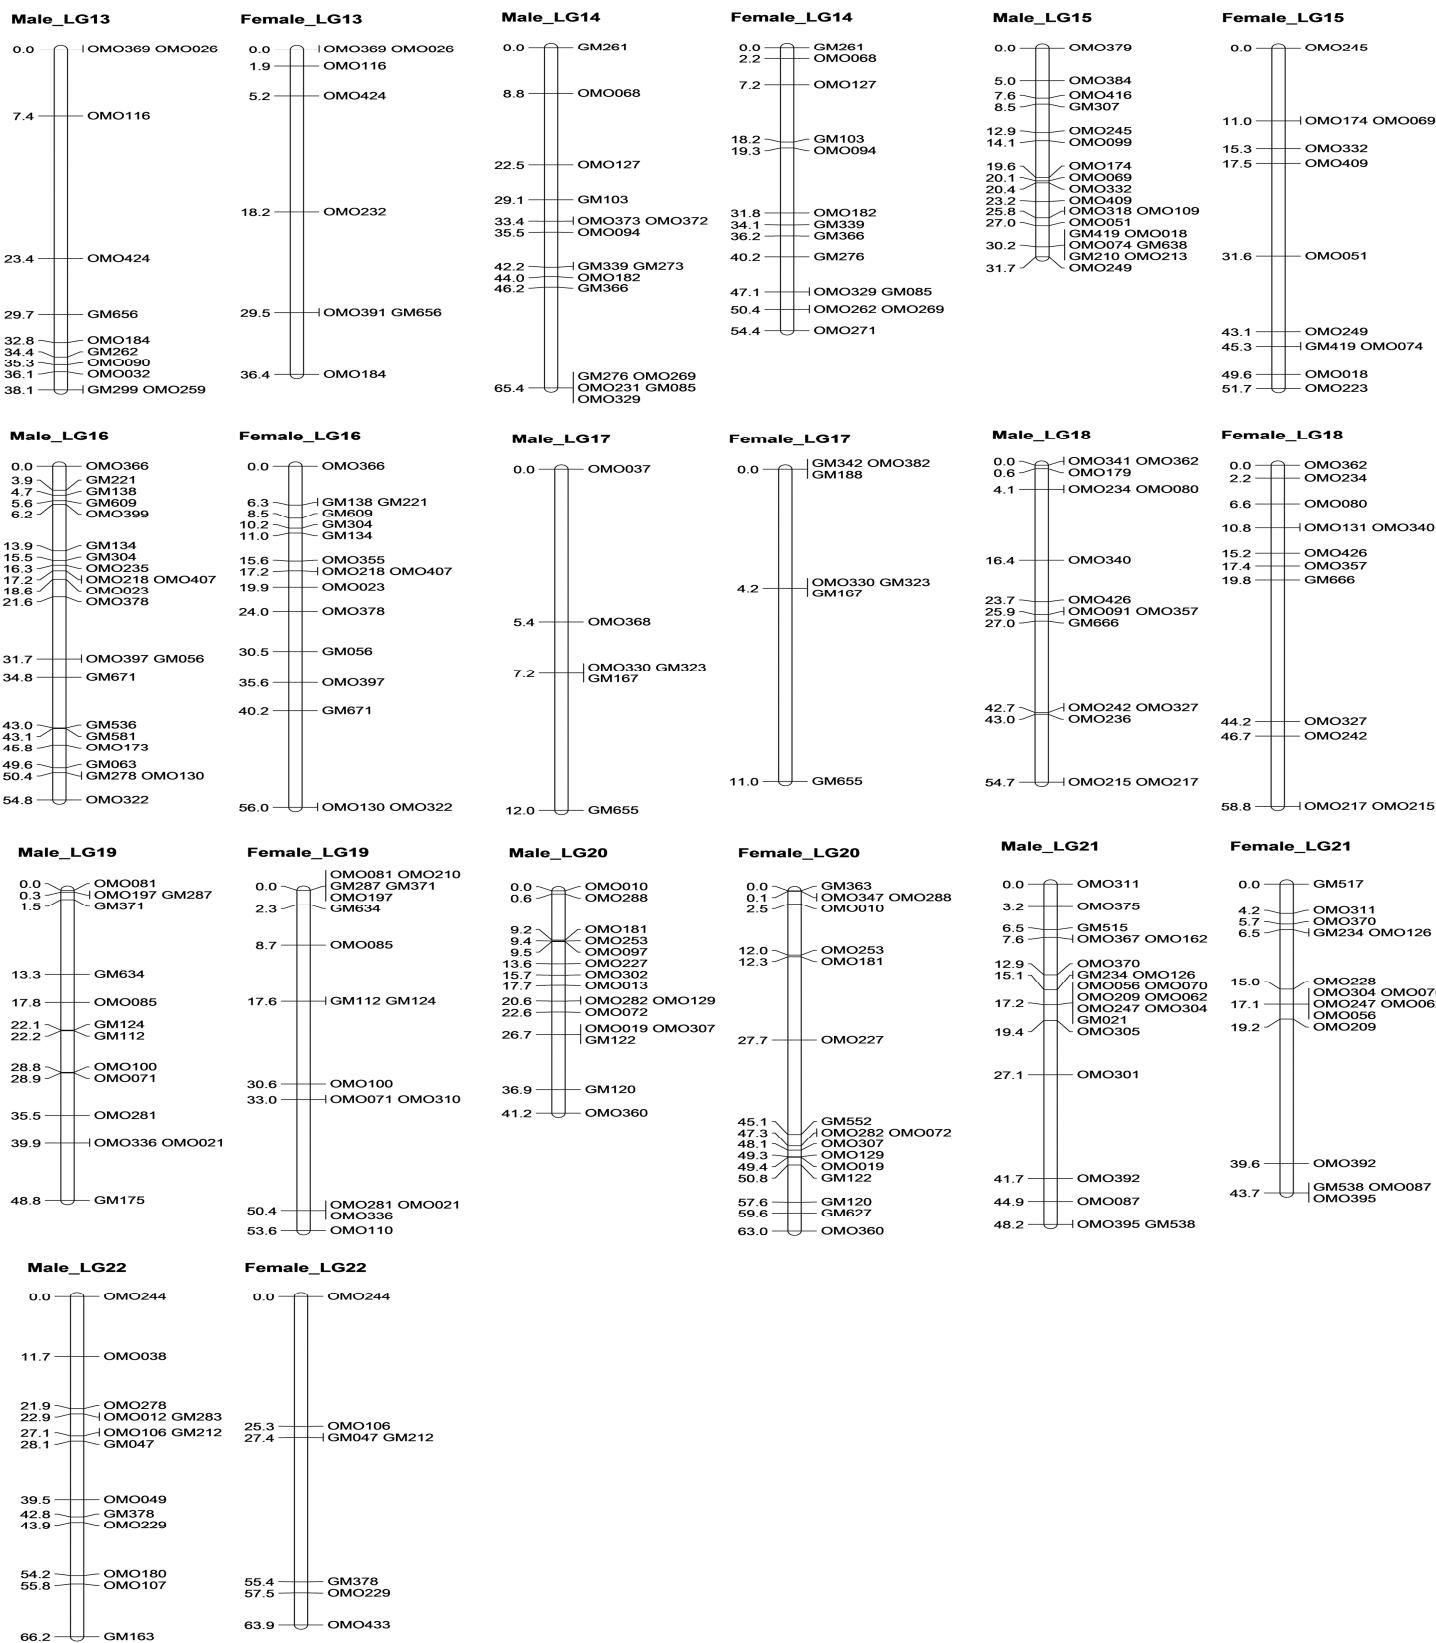

Figure S2. Linkage maps of male and female (2)
