# Supplementary material for: A microsatellite-based linkage map of salt tolerant tilapia (Oreochromis mossambicus x Oreochromis spp.) and mapping of sex-determining loci
Source: PubMed Central journal article supplement (PMC3565888; doi:10.1186/1471-2164-14-58), 2013-01-28
Supplement: 1471-2164-14-58-S10.pdf [file 1471-2164-14-58-S10.pdf]

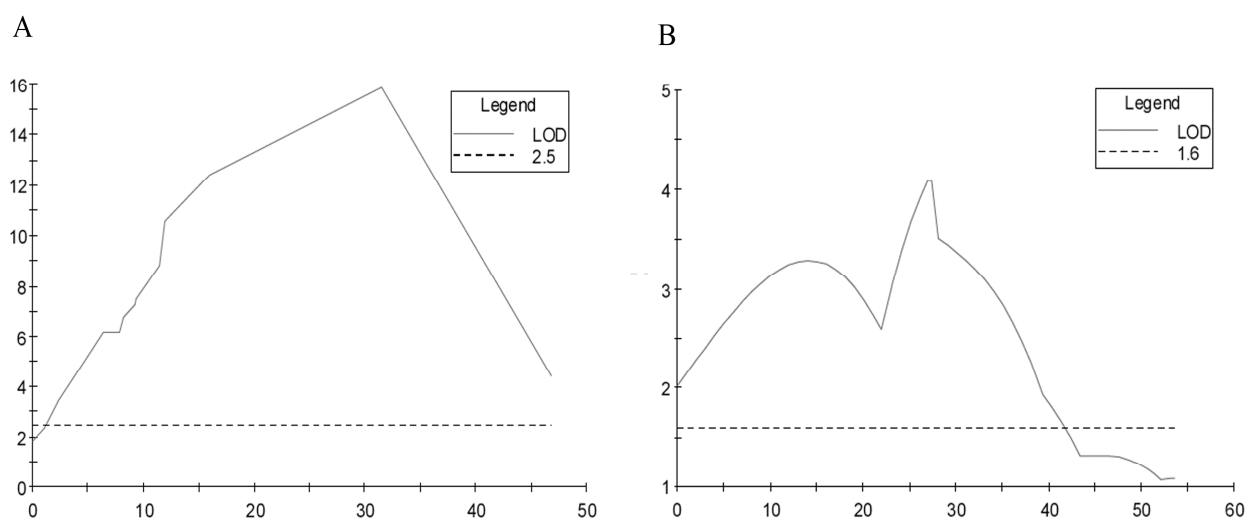

**Figure S3. Mapping of sex determination loci in LG1(A) and LG22(B)**  
**The dotted lines indicate the significance thresholds of the LOD score in linkage groups.**
